# Supplementary material for: Short-term effects of CO2 leakage on the soil bacterial community in a simulated gas leakage scenario
Source: PeerJ journal article supplement (doi:10.7717/peerj.4024), 2017-11-14
Supplement: 2.pdf [file 2.pdf]

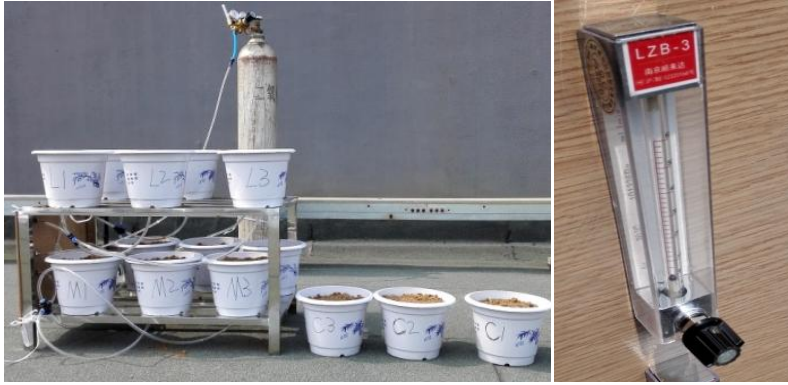

Profile of the experimental device
